# Supplementary material for: Genome Analysis Reveals Interplay between 5′UTR Introns and Nuclear mRNA Export for Secretory and Mitochondrial Genes
Source: PubMed Central journal article supplement (PMC3077370; doi:10.1371/journal.pgen.1001366), 2011-04-14

## Leucine Codon Bias

A

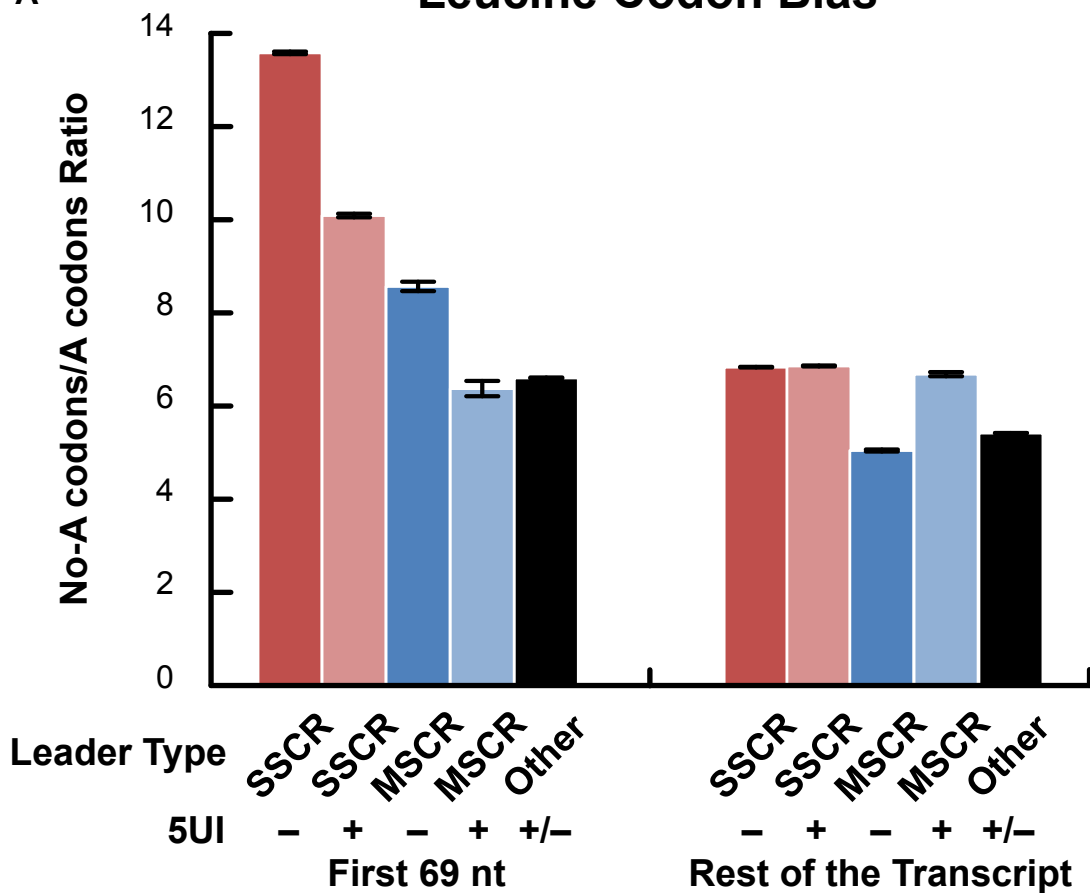

## Serine Codon Bias

B

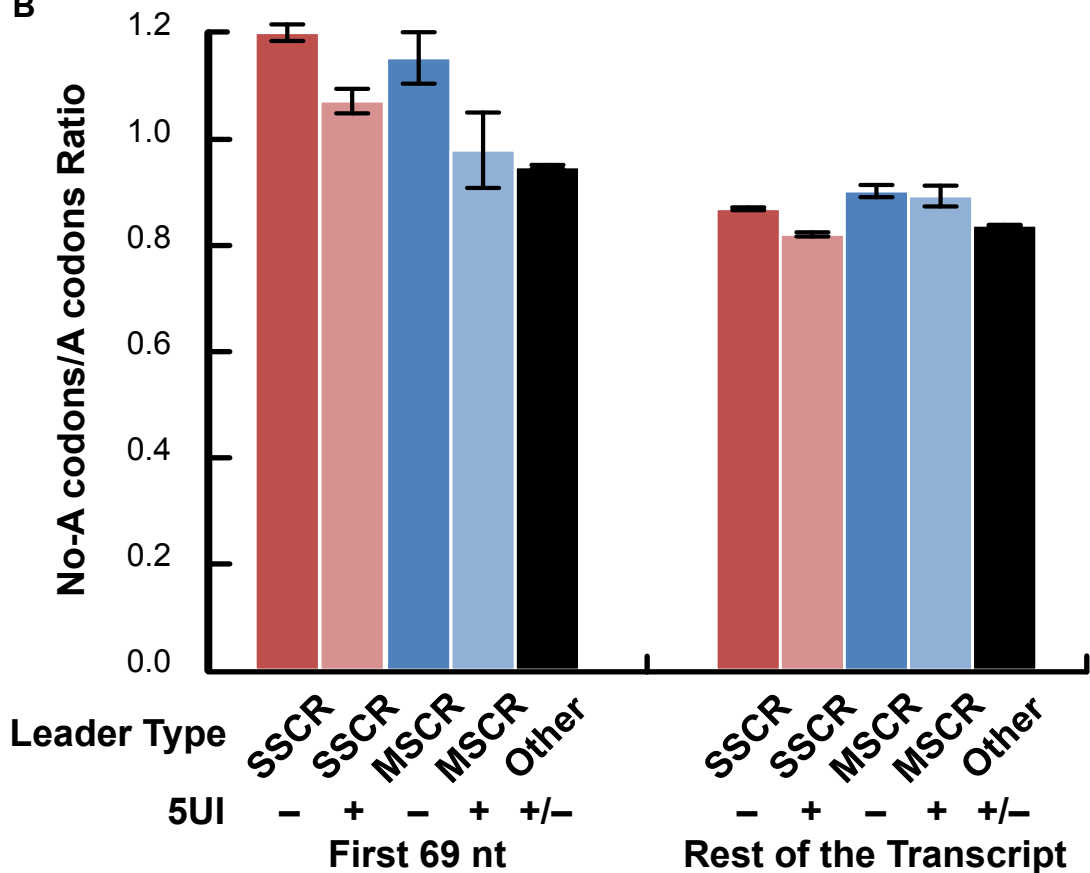

Supplement: pgen.1001366.s004.pdf [file pgen.1001366.s004.pdf]
