# Supplementary material for: Genome Analysis Reveals Interplay between 5′UTR Introns and Nuclear mRNA Export for Secretory and Mitochondrial Genes
Source: PubMed Central journal article supplement (PMC3077370; doi:10.1371/journal.pgen.1001366), 2011-04-14

**Positions of All Occurrences of the Motif**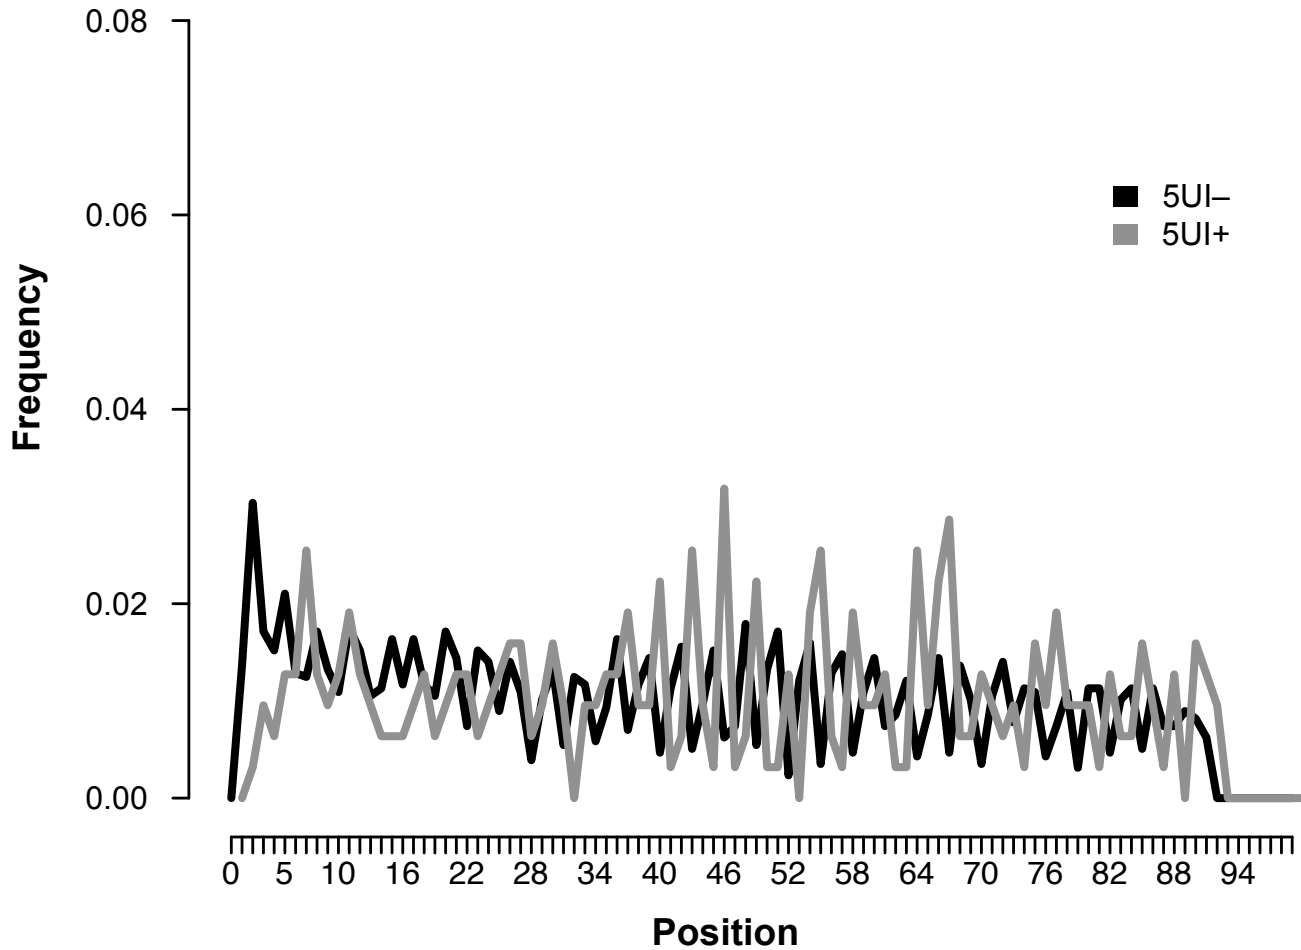

Supplement: pgen.1001366.s006.pdf [file pgen.1001366.s006.pdf]
