# Supplementary material for: Genome Analysis Reveals Interplay between 5′UTR Introns and Nuclear mRNA Export for Secretory and Mitochondrial Genes
Source: PubMed Central journal article supplement (PMC3077370; doi:10.1371/journal.pgen.1001366), 2011-04-14
Supplement: pgen.1001366.s011.pdf [file pgen.1001366.s011.pdf]

| N   | X    | LOD    | P       | P-adj   | GO Attribute                                                                                                           |
|-----|------|--------|---------|---------|------------------------------------------------------------------------------------------------------------------------|
| 5   | 355  | -1.553 | 3.8e-59 | <0.0001 | <a href="#">GO:0004984</a> : olfactory receptor activity                                                               |
| 0   | 25   | -1.445 | 1.9e-05 | 0.0141  | <a href="#">GO:0042613</a> : MHC class II protein complex                                                              |
| 0   | 23   | -1.409 | 4.5e-05 | 0.0339  | <a href="#">GO:0002504</a> : antigen processing and presentation of peptide or polysaccharide antigen via MHC class II |
| 0   | 23   | -1.409 | 4.5e-05 | 0.0339  | <a href="#">GO:0004190</a> : aspartic-type endopeptidase activity                                                      |
| 7   | 313  | -1.358 | 1.8e-48 | <0.0001 | <a href="#">GO:0007608</a> : sensory perception of smell                                                               |
| 2   | 73   | -1.195 | 1.3e-11 | <0.0001 | <a href="#">GO:0042611</a> : MHC protein complex                                                                       |
| 12  | 337  | -1.163 | 1.6e-46 | <0.0001 | <a href="#">GO:0007606</a> : sensory perception of chemical stimulus                                                   |
| 1   | 32   | -1.059 | 1.6e-05 | 0.0114  | <a href="#">GO:0045095</a> : keratin filament                                                                          |
| 2   | 48   | -1.007 | 3e-07   | 0.0001  | <a href="#">GO:0042612</a> : MHC class I protein complex                                                               |
| 5   | 101  | -0.983 | 3.2e-13 | <0.0001 | <a href="#">GO:0019882</a> : antigen processing and presentation                                                       |
| 2   | 35   | -0.864 | 4.7e-05 | 0.0350  | <a href="#">GO:0005245</a> : voltage-gated calcium channel activity                                                    |
| 14  | 134  | -0.659 | 3.8e-11 | <0.0001 | <a href="#">GO:0005882</a> : intermediate filament                                                                     |
| 14  | 134  | -0.659 | 3.8e-11 | <0.0001 | <a href="#">GO:0045111</a> : intermediate filament cytoskeleton                                                        |
| 17  | 133  | -0.562 | 3.7e-09 | <0.0001 | <a href="#">GO:0004222</a> : metalloendopeptidase activity                                                             |
| 9   | 71   | -0.556 | 1.6e-05 | 0.0114  | <a href="#">GO:0000786</a> : nucleosome                                                                                |
| 13  | 89   | -0.491 | 1.1e-05 | 0.0080  | <a href="#">GO:0006334</a> : nucleosome assembly                                                                       |
| 115 | 712  | -0.464 | 5.8e-31 | <0.0001 | <a href="#">GO:0001584</a> : rhodopsin-like receptor activity                                                          |
| 17  | 101  | -0.422 | 3.3e-05 | 0.0254  | <a href="#">GO:0031497</a> : chromatin assembly                                                                        |
| 123 | 657  | -0.384 | 1.9e-21 | <0.0001 | <a href="#">GO:0007600</a> : sensory perception                                                                        |
| 33  | 180  | -0.383 | 4e-07   | 0.0001  | <a href="#">GO:0008083</a> : growth factor activity                                                                    |
| 161 | 841  | -0.375 | 7.6e-26 | <0.0001 | <a href="#">GO:0004930</a> : G-protein coupled receptor activity                                                       |
| 27  | 145  | -0.373 | 7.7e-06 | 0.0050  | <a href="#">GO:0009055</a> : electron carrier activity                                                                 |
| 29  | 146  | -0.339 | 3.3e-05 | 0.0257  | <a href="#">GO:0020037</a> : heme binding                                                                              |
| 29  | 146  | -0.339 | 3.3e-05 | 0.0257  | <a href="#">GO:0046906</a> : tetrapyrrole binding                                                                      |
| 50  | 240  | -0.316 | 6.9e-07 | 0.0002  | <a href="#">GO:0005125</a> : cytokine activity                                                                         |
| 270 | 1253 | -0.315 | 7.7e-28 | <0.0001 | <a href="#">GO:0004888</a> : transmembrane receptor activity                                                           |
| 202 | 943  | -0.313 | 1.9e-21 | <0.0001 | <a href="#">GO:0050877</a> : neurological system process                                                               |
| 48  | 224  | -0.300 | 4.3e-06 | 0.0027  | <a href="#">GO:0008237</a> : metallopeptidase activity                                                                 |
| 108 | 497  | -0.298 | 2.2e-11 | <0.0001 | <a href="#">GO:0005615</a> : extracellular space                                                                       |
| 242 | 1056 | -0.276 | 3.1e-19 | <0.0001 | <a href="#">GO:0007186</a> : G-protein coupled receptor protein signaling pathway                                      |
| 49  | 216  | -0.268 | 4e-05   | 0.0302  | <a href="#">GO:0008236</a> : serine-type peptidase activity                                                            |
| 50  | 217  | -0.260 | 6.3e-05 | 0.0441  | <a href="#">GO:0017171</a> : serine hydrolase activity                                                                 |
| 109 | 466  | -0.256 | 1.4e-08 | <0.0001 | <a href="#">GO:0004175</a> : endopeptidase activity                                                                    |
| 72  | 305  | -0.248 | 6.4e-06 | 0.0040  | <a href="#">GO:0005506</a> : iron ion binding                                                                          |
| 288 | 1190 | -0.245 | 1.5e-17 | <0.0001 | <a href="#">GO:0003008</a> : system process                                                                            |
| 471 | 1902 | -0.240 | 2.6e-25 | <0.0001 | <a href="#">GO:0004872</a> : receptor activity                                                                         |
| 426 | 1679 | -0.222 | 6.2e-20 | <0.0001 | <a href="#">GO:0007166</a> : cell surface receptor linked signal transduction                                          |

| <b>N</b> | <b>X</b> | <b>LOD</b> | <b>P</b> | <b>P-adj</b> | <b>GO Attribute</b>                                           |
|----------|----------|------------|----------|--------------|---------------------------------------------------------------|
| 194      | 765      | -0.212     | 1.3e-09  | <0.0001      | <a href="#">GO:0044421</a> : extracellular region part        |
| 210      | 813      | -0.202     | 2.5e-09  | <0.0001      | <a href="#">GO:0005739</a> : mitochondrion                    |
| 196      | 743      | -0.188     | 8e-08    | <0.0001      | <a href="#">GO:0005102</a> : receptor binding                 |
| 640      | 2360     | -0.187     | 1.3e-19  | <0.0001      | <a href="#">GO:0004871</a> : signal transducer activity       |
| 640      | 2360     | -0.187     | 1.3e-19  | <0.0001      | <a href="#">GO:0060089</a> : molecular transducer activity    |
| 182      | 685      | -0.183     | 4.5e-07  | 0.0001       | <a href="#">GO:0008233</a> : peptidase activity               |
| 211      | 782      | -0.175     | 2.7e-07  | 0.0001       | <a href="#">GO:0006508</a> : proteolysis                      |
| 823      | 2912     | -0.164     | 1.8e-18  | <0.0001      | <a href="#">GO:0005886</a> : plasma membrane                  |
| 172      | 626      | -0.162     | 1.5e-05  | 0.0106       | <a href="#">GO:0006955</a> : immune response                  |
| 488      | 1742     | -0.160     | 8.8e-12  | <0.0001      | <a href="#">GO:0005576</a> : extracellular region             |
| 185      | 664      | -0.154     | 2.2e-05  | 0.0155       | <a href="#">GO:0015031</a> : protein transport                |
| 701      | 2420     | -0.143     | 1.2e-12  | <0.0001      | <a href="#">GO:0050896</a> : response to stimulus             |
| 229      | 807      | -0.143     | 1.3e-05  | 0.0095       | <a href="#">GO:0016491</a> : oxidoreductase activity          |
| 224      | 786      | -0.141     | 2.3e-05  | 0.0168       | <a href="#">GO:0033036</a> : macromolecule localization       |
| 934      | 3132     | -0.128     | 1.1e-12  | <0.0001      | <a href="#">GO:0032501</a> : multicellular organismal process |
| 1495     | 4899     | -0.124     | 2.6e-16  | <0.0001      | <a href="#">GO:0016021</a> : integral to membrane             |
| 1528     | 4991     | -0.122     | 4.7e-16  | <0.0001      | <a href="#">GO:0031224</a> : intrinsic to membrane            |
| 1738     | 5604     | -0.116     | 9.3e-16  | <0.0001      | <a href="#">GO:0044425</a> : membrane part                    |
| 2110     | 6701     | -0.112     | 4.4e-16  | <0.0001      | <a href="#">GO:0016020</a> : membrane                         |
| 1210     | 3898     | -0.103     | 2.7e-10  | <0.0001      | <a href="#">GO:0007154</a> : cell communication               |
| 1108     | 3565     | -0.100     | 2.9e-09  | <0.0001      | <a href="#">GO:0007165</a> : signal transduction              |

LOD score < -0.1 p-value < 0.05
