# Supplementary material for: Genome Analysis Reveals Interplay between 5′UTR Introns and Nuclear mRNA Export for Secretory and Mitochondrial Genes
Source: PLoS Genet. 2011 Apr 14;7(4):e1001366. doi: 10.1371/journal.pgen.1001366 (PMC3077370; doi:10.1371/journal.pgen.1001366)
Supplement: Table S2 — 19 motifs discovered by AlignACE are significantly represented among 5UI− Genes. AlignACE motifs that were enriched among 5UI− genes and the DEME motif were shown. There were 938 and 2594 total sequences in the 5UI+ set and the 5UI− set, respectively. Fisher's exact test was used to test the significance of enrichment of motif containing genes among 5UI− genes. (0.04 MB PDF) [file pgen.1001366.s012.pdf]

| ID   | CONSENSUS        | Fraction of<br>5UI+ Genes<br>with Motifs | Fraction of<br>5UI- Genes<br>with Motifs | Fisher's<br>Exact Test p-<br>value (-log10) | Fisher's Exact<br>Test Odds Ratio<br>(log10) |
|------|------------------|------------------------------------------|------------------------------------------|---------------------------------------------|----------------------------------------------|
| DEME | cggcgc           | 0.21                                     | 0.46                                     | 44.28                                       | 1.18                                         |
| 1    | cggcggcggc       | 0.28                                     | 0.54                                     | 42.20                                       | 1.09                                         |
| 2    | gctggccctggcgc   | 0.37                                     | 0.58                                     | 27.91                                       | 0.86                                         |
| 3    | gctgctgccgctggcc | 0.38                                     | 0.59                                     | 27.07                                       | 0.84                                         |
| 4    | ctggctgctgctgc   | 0.42                                     | 0.63                                     | 26.55                                       | 0.83                                         |
| 5    | gctggggctgctgc   | 0.34                                     | 0.54                                     | 25.25                                       | 0.82                                         |
| 6    | gctgctggccc      | 0.13                                     | 0.29                                     | 23.01                                       | 0.99                                         |
| 7    | caggggccgag      | 0.49                                     | 0.67                                     | 22.80                                       | 0.77                                         |
| 8    | ggcgctgctgctgctg | 0.53                                     | 0.71                                     | 22.69                                       | 0.78                                         |
| 9    | cccgggccag       | 0.51                                     | 0.69                                     | 21.47                                       | 0.75                                         |
| 10   | cgcagccccgg      | 0.56                                     | 0.73                                     | 21.37                                       | 0.77                                         |
| 11   | ccggggctgctg     | 0.45                                     | 0.63                                     | 20.62                                       | 0.73                                         |
| 12   | gaggccaggag      | 0.46                                     | 0.63                                     | 19.99                                       | 0.72                                         |
| 13   | gcggaggcgag      | 0.38                                     | 0.56                                     | 19.52                                       | 0.71                                         |
| 14   | agggccccccagcac  | 0.40                                     | 0.56                                     | 16.25                                       | 0.64                                         |
| 15   | caggaggcgga      | 0.66                                     | 0.79                                     | 15.37                                       | 0.69                                         |
| 16   | gggctgctgg       | 0.58                                     | 0.72                                     | 15.11                                       | 0.64                                         |
| 17   | cagcagcagc       | 0.75                                     | 0.86                                     | 13.05                                       | 0.71                                         |
| 18   | cagccgcaggcacag  | 0.62                                     | 0.75                                     | 12.66                                       | 0.60                                         |
| 19   | cggcgc           | 0.21                                     | 0.46                                     | 44.28                                       | 1.18                                         |
